# Supplementary material for: CYP26A1 Is a Novel Cancer Biomarker of Pancreatic Carcinoma: Evidence from Integration Analysis and In Vitro Experiments
Source: Hindawi journal article supplement (doi:10.1155/2022/5286820), 2022-06-06

Figure S1. Western blot indicated the knockdown efficiency of CYP26A1 in the protein level.

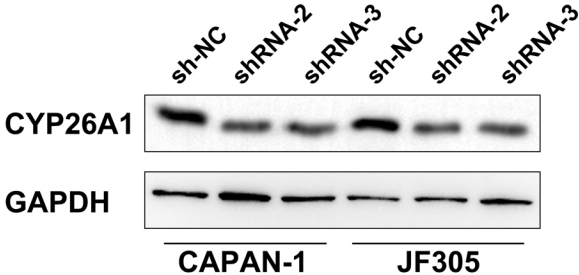

Supplement: f1 [file 5286820.f1.pdf]
